# Supplementary material
Source: PubMed Central journal article supplement (PMC2274942)
Supplement: ajrcmb_38_4_380__1.pdf [file ajrcmb_38_4_380__1.pdf]

# **The Prolonged Life-Span of Alveolar Macrophages**

Jaime Murphy, Ross Summer, Andrew A. Wilson, Darrell N. Kotton, and Alan Fine

The Pulmonary Center, Boston University School of Medicine, Boston, Massachusetts

Online Data Supplement

**Supplementary Figure E1:** Histology, cytology and mac-3 staining 3 months post transplant. (a) low power (10x) view of hematoxylin and eosin stained lungs from a wild-type control, shielded and unshielded animals (3 months post transplant). (b) High power view (40x) of Wright-Giemsa (top panel) and mac-3 (bottom panel) staining of BAL specimens from a wild-type control, shielded and unshielded animals (3 months post transplant).

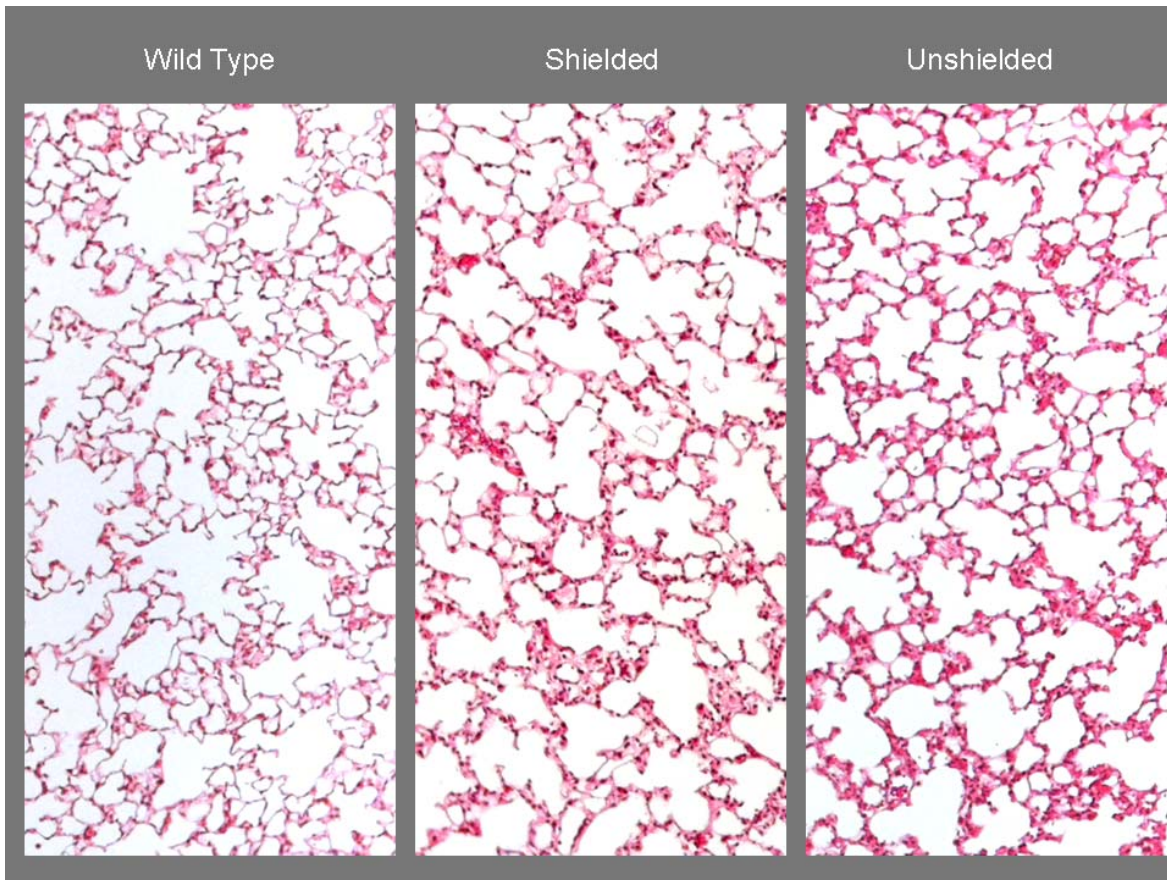

**Figure E1a**

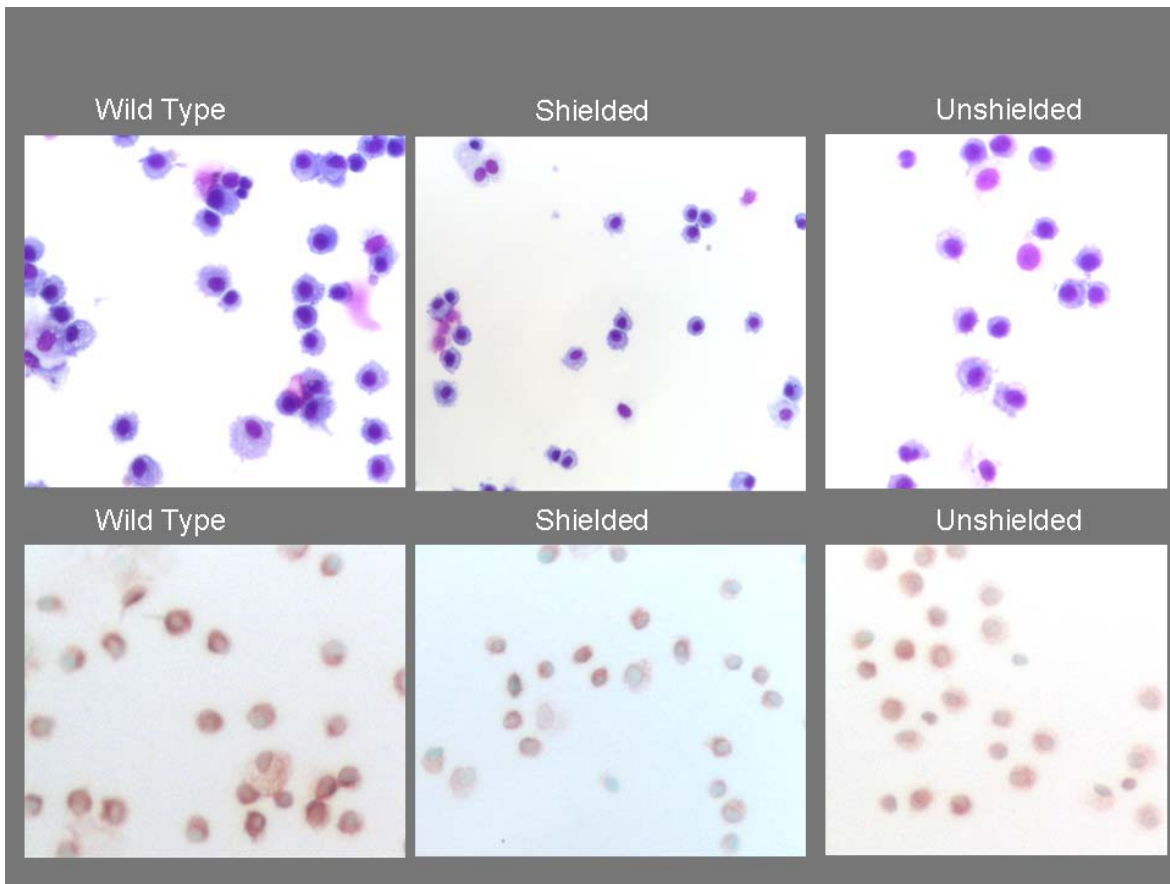

**Figure E1b**
